# Supplementary material
Source: publisher site journal article supplement (https://www.dovepress.com/article/538253)
Supplement: Supplementary file 1 [file Supplement%20Table%201-%20revised_1.pdf]

**Supplement Table 1-1 The accuracy scores for the 100 cases**

| Disease type                                 | Disease                                     | Case       | ouput1 | output2 | output3 |
|----------------------------------------------|---------------------------------------------|------------|--------|---------|---------|
| HEM                                          | Iron deficiency anemia                      | case_1_Q1  | 5      | 5       | 5       |
|                                              |                                             | case_1_Q2  | 4      | 5       | 5       |
|                                              |                                             | case_1_Q3  | 5      | 5       | 5       |
|                                              | Megaloblastic anemia                        | case_2_Q1  | 6      | 6       | 6       |
|                                              |                                             | case_2_Q2  | 3      | 4       | 4       |
|                                              |                                             | case_2_Q3  | 5      | 5       | 4       |
|                                              | Aplastic anemia                             | case_3_Q1  | 6      | 6       | 5       |
|                                              |                                             | case_3_Q2  | 5      | 4       | 4       |
|                                              |                                             | case_3_Q3  | 5      | 5       | 5       |
|                                              | Heredi taryspherocytosis                    | case_4_Q1  | 6      | 5       | 5       |
|                                              |                                             | case_4_Q2  | 2      | 2       | 2       |
|                                              |                                             | case_4_Q3  | 6      | 4       | 4       |
|                                              | Glucose-6-phosphatedehydrogenase deficiency | case_5_Q1  | 6      | 6       | 6       |
|                                              |                                             | case_5_Q2  | 4      | 5       | 5       |
|                                              |                                             | case_5_Q3  | 5      | 5       | 5       |
|                                              | Symptomatic anemia                          | case_6_Q1  | 5      | 4       | 4       |
|                                              |                                             | case_6_Q2  | 5      | 5       | 5       |
|                                              |                                             | case_6_Q3  | 6      | 5       | 5       |
|                                              | Acuteleukemia                               | case_7_Q1  | 5      | 5       | 5       |
|                                              |                                             | case_7_Q2  | 4      | 5       | 5       |
|                                              |                                             | case_7_Q3  | 3      | 5       | 5       |
|                                              | Myelodysplastic syndromes                   | case_8_Q1  | 5      | 5       | 5       |
|                                              |                                             | case_8_Q2  | 6      | 5       | 5       |
|                                              |                                             | case_8_Q3  | 5      | 5       | 5       |
|                                              | Chronic lymphocytic leukemia                | case_9_Q1  | 3      | 6       | 4       |
|                                              |                                             | case_9_Q2  | 2      | 6       | 3       |
|                                              |                                             | case_9_Q3  | 6      | 4       | 4       |
|                                              | Hairy cell leukemia                         | case_10_Q1 | 6      | 3       | 3       |
|                                              |                                             | case_10_Q2 | 2      | 2       | 2       |
|                                              |                                             | case_10_Q3 | 2      | 4       | 4       |
|                                              | Multiple myeloma                            | case_11_Q1 | 6      | 5       | 5       |
|                                              |                                             | case_11_Q2 | 2      | 2       | 2       |
|                                              |                                             | case_11_Q3 | 5      | 5       | 5       |
| Leukemoid reaction                           | case_12_Q1                                  | 6          | 5      | 4       |         |
|                                              | case_12_Q2                                  | 3          | 4      | 4       |         |
|                                              | case_12_Q3                                  | 2          | 3      | 3       |         |
| Vascular von willebrand disease              | case_13_Q1                                  | 5          | 6      | 6       |         |
|                                              | case_13_Q2                                  | 5          | 5      | 6       |         |
|                                              | case_13_Q3                                  | 5          | 6      | 5       |         |
| Primary immunologic thrombocytopenic purpura | case_14_Q1                                  | 5          | 6      | 6       |         |
|                                              | case_14_Q2                                  | 2          | 3      | 3       |         |
|                                              | case_14_Q3                                  | 5          | 6      | 5       |         |
| Anaphylactoid purpura                        | case_15_Q1                                  | 5          | 6      | 2       |         |
|                                              | case_15_Q2                                  | 1          | 3      | 2       |         |
|                                              | case_15_Q3                                  | 2          | 4      | 3       |         |
| Vitamin K deficiency                         | case_16_Q1                                  | 2          | 5      | 3       |         |
|                                              | case_16_Q2                                  | 3          | 4      | 4       |         |
|                                              | case_16_Q3                                  | 4          | 5      | 5       |         |
|                                              |                                             | case_17_Q1 | 3      | 5       | 5       |

|                    |                              |            |   |   |   |
|--------------------|------------------------------|------------|---|---|---|
| ORG                | Essential hypertension       | case_17_Q2 | 4 | 4 | 4 |
|                    |                              | case_17_Q3 | 4 | 5 | 5 |
|                    | Secondary hypertension       | case_18_Q1 | 5 | 6 | 6 |
|                    |                              | case_18_Q2 | 5 | 6 | 6 |
|                    |                              | case_18_Q3 | 5 | 5 | 5 |
|                    | Acute myocardial infarction  | case_19_Q1 | 5 | 6 | 5 |
|                    |                              | case_19_Q2 | 5 | 4 | 5 |
|                    |                              | case_19_Q3 | 5 | 5 | 5 |
|                    | Heart failure                | case_20_Q1 | 6 | 5 | 5 |
|                    |                              | case_20_Q2 | 2 | 3 | 3 |
|                    |                              | case_20_Q3 | 5 | 5 | 5 |
|                    | Acute viral hepatitis type B | case_21_Q1 | 5 | 6 | 6 |
|                    |                              | case_21_Q2 | 5 | 6 | 6 |
|                    |                              | case_21_Q3 | 5 | 6 | 6 |
|                    | Chronic hepatitis B          | case_22_Q1 | 6 | 6 | 6 |
|                    |                              | case_22_Q2 | 5 | 5 | 5 |
|                    |                              | case_22_Q3 | 5 | 5 | 5 |
|                    | Acute hepatitis E            | case_23_Q1 | 3 | 6 | 6 |
|                    |                              | case_23_Q2 | 6 | 5 | 5 |
|                    |                              | case_23_Q3 | 5 | 6 | 6 |
|                    | Alcoholic liver disease      | case_24_Q1 | 6 | 5 | 6 |
|                    |                              | case_24_Q2 | 4 | 4 | 4 |
|                    |                              | case_24_Q3 | 5 | 5 | 5 |
|                    | Acute glomerulonephritis     | case_25_Q1 | 5 | 6 | 6 |
|                    |                              | case_25_Q2 | 6 | 5 | 5 |
|                    |                              | case_25_Q3 | 5 | 5 | 5 |
|                    | Nephrotic syndrome           | case_26_Q1 | 6 | 5 | 5 |
|                    |                              | case_26_Q2 | 3 | 5 | 4 |
|                    |                              | case_26_Q3 | 5 | 6 | 6 |
|                    | Chronic renal failure        | case_27_Q1 | 6 | 6 | 5 |
|                    |                              | case_27_Q2 | 5 | 6 | 6 |
|                    |                              | case_27_Q3 | 6 | 6 | 5 |
|                    | Diabetes complications       | case_28_Q1 | 4 | 5 | 5 |
|                    |                              | case_28_Q2 | 6 | 5 | 5 |
|                    |                              | case_28_Q3 | 4 | 5 | 5 |
|                    | Pepticulcer                  | case_29_Q1 | 5 | 6 | 6 |
|                    |                              | case_29_Q2 | 3 | 4 | 4 |
|                    |                              | case_29_Q3 | 4 | 5 | 5 |
|                    | Chronic gastritis            | case_30_Q1 | 6 | 6 | 6 |
|                    |                              | case_30_Q2 | 4 | 5 | 5 |
|                    |                              | case_30_Q3 | 5 | 5 | 4 |
|                    | Chronic diarrhea             | case_31_Q1 | 5 | 5 | 5 |
|                    |                              | case_31_Q2 | 5 | 6 | 6 |
|                    |                              | case_31_Q3 | 5 | 5 | 5 |
|                    | Intestinal tuberculosis      | case_32_Q1 | 1 | 3 | 3 |
|                    |                              | case_32_Q2 | 1 | 3 | 3 |
| case_32_Q3         |                              | 2          | 5 | 5 |   |
| Acute pancreatitis | case_33_Q1                   | 6          | 5 | 5 |   |
|                    | case_33_Q2                   | 5          | 6 | 5 |   |
|                    | case_33_Q3                   | 5          | 6 | 6 |   |
| Cushing's syndrome | case_34_Q1                   | 6          | 5 | 4 |   |
|                    | case_34_Q2                   | 2          | 4 | 4 |   |

|                              |                              |            |   |   |   |
|------------------------------|------------------------------|------------|---|---|---|
| MET                          | Primary aldosteronism        | case_34_Q3 | 5 | 6 | 5 |
|                              |                              | case_35_Q1 | 5 | 6 | 6 |
|                              |                              | case_35_Q2 | 2 | 4 | 5 |
|                              |                              | case_35_Q3 | 5 | 6 | 5 |
|                              | Hyperthyroidism              | case_36_Q1 | 5 | 5 | 5 |
|                              |                              | case_36_Q2 | 2 | 5 | 5 |
|                              |                              | case_36_Q3 | 3 | 5 | 5 |
|                              | Hypothyroidism               | case_37_Q1 | 6 | 6 | 6 |
|                              |                              | case_37_Q2 | 5 | 4 | 4 |
|                              |                              | case_37_Q3 | 5 | 5 | 5 |
|                              | Hypititary dwarfism          | case_38_Q1 | 3 | 4 | 5 |
|                              |                              | case_38_Q2 | 1 | 4 | 3 |
|                              |                              | case_38_Q3 | 5 | 5 | 5 |
|                              | Diabetes insipidus           | case_39_Q1 | 6 | 5 | 5 |
|                              |                              | case_39_Q2 | 2 | 5 | 4 |
|                              |                              | case_39_Q3 | 5 | 5 | 5 |
|                              | Precocious puberty           | case_40_Q1 | 5 | 5 | 5 |
|                              |                              | case_40_Q2 | 6 | 6 | 3 |
|                              |                              | case_40_Q3 | 5 | 6 | 6 |
|                              | Polycystic ovary syndrome    | case_41_Q1 | 5 | 6 | 6 |
|                              |                              | case_41_Q2 | 2 | 4 | 2 |
|                              |                              | case_41_Q3 | 5 | 4 | 4 |
|                              | Vitamin D deficiency rickets | case_42_Q1 | 5 | 6 | 6 |
|                              |                              | case_42_Q2 | 5 | 5 | 5 |
|                              |                              | case_42_Q3 | 5 | 5 | 5 |
|                              | Senile osteoporosis          | case_43_Q1 | 6 | 6 | 6 |
|                              |                              | case_43_Q2 | 5 | 5 | 5 |
|                              |                              | case_43_Q3 | 6 | 6 | 6 |
|                              | Ricketsandosteomalacia       | case_44_Q1 | 4 | 2 | 1 |
|                              |                              | case_44_Q2 | 1 | 2 | 2 |
|                              |                              | case_44_Q3 | 5 | 2 | 2 |
|                              | Acute suppurative arthritis  | case_45_Q1 | 6 | 6 | 6 |
|                              |                              | case_45_Q2 | 3 | 4 | 4 |
|                              |                              | case_45_Q3 | 5 | 6 | 3 |
|                              | Coxotuberculosis             | case_46_Q1 | 5 | 3 | 3 |
|                              |                              | case_46_Q2 | 3 | 3 | 3 |
|                              |                              | case_46_Q3 | 5 | 5 | 5 |
|                              | Bronchial asthma             | case_47_Q1 | 6 | 6 | 6 |
|                              |                              | case_47_Q2 | 1 | 3 | 3 |
|                              |                              | case_47_Q3 | 5 | 5 | 5 |
|                              | Hemolytic disease of newborn | case_48_Q1 | 6 | 6 | 6 |
|                              |                              | case_48_Q2 | 6 | 6 | 5 |
| case_48_Q3                   |                              | 5          | 6 | 6 |   |
| Systemic lupus erythematosus | case_49_Q1                   | 5          | 6 | 6 |   |
|                              | case_49_Q2                   | 6          | 5 | 5 |   |
|                              | case_49_Q3                   | 5          | 5 | 5 |   |
| Rheumatoid arthritis         | case_50_Q1                   | 5          | 6 | 6 |   |
|                              | case_50_Q2                   | 4          | 4 | 4 |   |
|                              | case_50_Q3                   | 4          | 5 | 5 |   |
| Systemic lupus erythematosus | case_51_Q1                   | 5          | 6 | 6 |   |
|                              | case_51_Q2                   | 4          | 4 | 4 |   |
|                              | case_51_Q3                   | 4          | 5 | 5 |   |
| IMM                          |                              |            |   |   |   |

|                               |                                 |                   |            |   |   |   |
|-------------------------------|---------------------------------|-------------------|------------|---|---|---|
|                               | Ankylosing spondylitis          | case_52_Q1        | 5          | 6 | 6 |   |
|                               |                                 | case_52_Q2        | 4          | 4 | 4 |   |
|                               |                                 | case_52_Q3        | 5          | 5 | 5 |   |
|                               | Sjogren's syndrome              | case_53_Q1        | 5          | 6 | 6 |   |
|                               |                                 | case_53_Q2        | 5          | 4 | 4 |   |
|                               |                                 | case_53_Q3        | 5          | 6 | 6 |   |
| INF-ANT                       | Febrile response                | case_54_Q1        | 5          | 5 | 5 |   |
|                               |                                 | case_54_Q2        | 4          | 5 | 5 |   |
|                               |                                 | case_54_Q3        | 5          | 6 | 5 |   |
|                               | Infectious diarrhea             | case_55_Q1        | 5          | 6 | 6 |   |
|                               |                                 | case_55_Q2        | 4          | 4 | 4 |   |
|                               |                                 | case_55_Q3        | 5          | 6 | 5 |   |
|                               | Genitourinary system infection  | case_56_Q1        | 5          | 6 | 6 |   |
|                               |                                 | case_56_Q2        | 5          | 6 | 6 |   |
|                               |                                 | case_56_Q3        | 5          | 5 | 5 |   |
|                               | Skin and soft tissue infections | case_57_Q1        | 6          | 6 | 6 |   |
|                               |                                 | case_57_Q2        | 3          | 4 | 4 |   |
|                               |                                 | case_57_Q3        | 5          | 5 | 5 |   |
|                               | Community acquired pneumonia    | case_58_Q1        | 5          | 5 | 5 |   |
|                               |                                 | case_58_Q2        | 4          | 4 | 4 |   |
|                               |                                 | case_58_Q3        | 4          | 5 | 5 |   |
|                               | Hospital acquired pneumonia     | case_59_Q1        | 6          | 6 | 6 |   |
|                               |                                 | case_59_Q2        | 5          | 5 | 5 |   |
|                               |                                 | case_59_Q3        | 5          | 5 | 5 |   |
|                               | Zoonosis                        | case_60_Q1        | 5          | 6 | 6 |   |
|                               |                                 | case_60_Q2        | 2          | 5 | 5 |   |
|                               |                                 | case_60_Q3        | 5          | 6 | 6 |   |
|                               | GEN-OB                          | Ectopic pregnancy | case_61_Q1 | 5 | 6 | 6 |
|                               |                                 |                   | case_61_Q2 | 4 | 5 | 5 |
|                               |                                 |                   | case_61_Q3 | 5 | 6 | 6 |
| Gestational diabetes mellitus |                                 | case_62_Q1        | 6          | 6 | 6 |   |
|                               |                                 | case_62_Q2        | 5          | 5 | 4 |   |
|                               |                                 | case_62_Q3        | 5          | 5 | 5 |   |
| Infertility                   |                                 | case_63_Q1        | 6          | 6 | 5 |   |
|                               |                                 | case_63_Q2        | 5          | 5 | 5 |   |
|                               |                                 | case_63_Q3        | 5          | 6 | 6 |   |
| Antenatal examination         |                                 | case_64_Q1        | 5          | 6 | 6 |   |
|                               |                                 | case_64_Q2        | 5          | 6 | 6 |   |
|                               |                                 | case_64_Q3        | 5          | 6 | 6 |   |
| Down syndrome                 |                                 | case_65_Q1        | 6          | 6 | 6 |   |
|                               |                                 | case_65_Q2        | 5          | 5 | 5 |   |
|                               |                                 | case_65_Q3        | 5          | 6 | 6 |   |
| Phenylketonuria               |                                 | case_66_Q1        | 6          | 6 | 6 |   |
|                               |                                 | case_66_Q2        | 2          | 3 | 3 |   |
|                               |                                 | case_66_Q3        | 6          | 6 | 5 |   |
| Thalassemia                   |                                 | case_67_Q1        | 6          | 6 | 6 |   |
|                               |                                 | case_67_Q2        | 5          | 6 | 5 |   |
|                               |                                 | case_67_Q3        | 5          | 6 | 6 |   |
| Hemophilia                    |                                 | case_68_Q1        | 5          | 6 | 6 |   |
|                               |                                 | case_68_Q2        | 5          | 5 | 5 |   |
|                               |                                 | case_68_Q3        | 5          | 6 | 6 |   |
|                               |                                 | case_69_Q1        | 5          | 6 | 6 |   |

|                      |                                       |            |   |   |   |
|----------------------|---------------------------------------|------------|---|---|---|
| ONC                  | Lung cancer                           | case_69_Q2 | 4 | 5 | 5 |
|                      |                                       | case_69_Q3 | 6 | 6 | 6 |
|                      | Gastric cancer                        | case_70_Q1 | 5 | 6 | 5 |
|                      |                                       | case_70_Q2 | 3 | 4 | 4 |
|                      |                                       | case_70_Q3 | 5 | 6 | 6 |
|                      | Liver cancer                          | case_71_Q1 | 5 | 5 | 5 |
|                      |                                       | case_71_Q2 | 4 | 5 | 5 |
|                      |                                       | case_71_Q3 | 5 | 6 | 6 |
|                      | Colorectal cancer                     | case_72_Q1 | 5 | 5 | 5 |
|                      |                                       | case_72_Q2 | 5 | 5 | 5 |
|                      |                                       | case_72_Q3 | 5 | 5 | 5 |
|                      | Breast cancer                         | case_73_Q1 | 5 | 6 | 5 |
|                      |                                       | case_73_Q2 | 4 | 5 | 5 |
|                      |                                       | case_73_Q3 | 5 | 6 | 6 |
|                      | Prostate cancer                       | case_74_Q1 | 6 | 6 | 6 |
| case_74_Q2           |                                       | 4          | 5 | 5 |   |
| case_74_Q3           |                                       | 2          | 5 | 5 |   |
| Ovarian cancer       | case_75_Q1                            | 5          | 6 | 6 |   |
|                      | case_75_Q2                            | 5          | 5 | 4 |   |
|                      | case_75_Q3                            | 5          | 5 | 5 |   |
| INF-ANT              | Pseudomonas aeruginosa pneumonia      | case_76_Q1 | 2 | 6 | 6 |
|                      |                                       | case_76_Q2 | 6 | 6 | 6 |
|                      |                                       | case_76_Q3 | 4 | 5 | 5 |
|                      | Late pregnancy phlogosis              | case_77_Q1 | 1 | 2 | 1 |
|                      |                                       | case_77_Q2 | 5 | 4 | 4 |
|                      |                                       | case_77_Q3 | 2 | 2 | 2 |
|                      | Pulmonary tuberculosis                | case_78_Q1 | 4 | 3 | 3 |
|                      |                                       | case_78_Q2 | 3 | 4 | 4 |
|                      |                                       | case_78_Q3 | 4 | 5 | 5 |
| Fungal cholecystitis | case_79_Q1                            | 6          | 6 | 6 |   |
|                      | case_79_Q2                            | 5          | 5 | 5 |   |
|                      | case_79_Q3                            | 3          | 5 | 5 |   |
| MET                  | Type 1 diabetes mellitus              | case_80_Q1 | 5 | 6 | 5 |
|                      |                                       | case_80_Q2 | 6 | 6 | 5 |
|                      |                                       | case_80_Q3 | 6 | 6 | 5 |
|                      | Type 2 diabetes mellitus              | case_81_Q1 | 6 | 4 | 4 |
|                      |                                       | case_81_Q2 | 6 | 5 | 6 |
|                      |                                       | case_81_Q3 | 6 | 5 | 6 |
|                      | Hypoglycemia                          | case_82_Q1 | 6 | 6 | 6 |
|                      |                                       | case_82_Q2 | 6 | 5 | 6 |
|                      |                                       | case_82_Q3 | 4 | 4 | 4 |
|                      | Diabetic ketoacidosis                 | case_83_Q1 | 6 | 6 | 6 |
|                      |                                       | case_83_Q2 | 5 | 4 | 5 |
|                      |                                       | case_83_Q3 | 5 | 5 | 5 |
|                      | Hyperosmotic nonketotic diabetic coma | case_84_Q1 | 6 | 6 | 6 |
|                      |                                       | case_84_Q2 | 5 | 6 | 5 |
|                      |                                       | case_84_Q3 | 3 | 5 | 4 |
| Hyperlipidemia       | case_85_Q1                            | 3          | 3 | 3 |   |
|                      | case_85_Q2                            | 4          | 4 | 4 |   |
|                      | case_85_Q3                            | 3          | 4 | 4 |   |
| Hypolipidemia        | case_86_Q1                            | 5          | 6 | 6 |   |
|                      | case_86_Q2                            | 4          | 5 | 5 |   |
|                      | case_86_Q3                            | 4          | 3 | 3 |   |
|                      |                                       | case_87_Q1 | 6 | 6 | 6 |

|                   |                                             |             |   |   |   |
|-------------------|---------------------------------------------|-------------|---|---|---|
| ORG               | Chronic obstructive pulmonary diseases      | case 87 Q2  | 4 | 4 | 4 |
|                   |                                             | case 87 Q3  | 4 | 5 | 5 |
|                   | Bronchial asthma                            | case 88 Q1  | 6 | 6 | 6 |
|                   |                                             | case 88 Q2  | 4 | 4 | 3 |
|                   |                                             | case 88 Q3  | 4 | 4 | 4 |
|                   | Pleural effusion                            | case 89 Q1  | 5 | 5 | 5 |
|                   |                                             | case 89 Q2  | 6 | 6 | 5 |
|                   |                                             | case 89 Q3  | 5 | 5 | 3 |
|                   | Respiratory failure                         | case 90 Q1  | 6 | 6 | 4 |
|                   |                                             | case 90 Q2  | 5 | 5 | 4 |
|                   |                                             | case 90 Q3  | 5 | 5 | 5 |
|                   | Pulmonary embolism                          | case 91 Q1  | 3 | 3 | 2 |
| case 91 Q2        |                                             | 4           | 5 | 5 |   |
| case 91 Q3        |                                             | 3           | 4 | 4 |   |
| HEM               | Febrile non-haemolytic transfusion reaction | case 92 Q1  | 6 | 5 | 6 |
|                   |                                             | case 92 Q2  | 5 | 4 | 6 |
|                   |                                             | case 92 Q3  | 3 | 4 | 4 |
| Acute hepatitis C | case 93 Q1                                  | 4           | 6 | 6 |   |
|                   | case 93 Q2                                  | 6           | 6 | 5 |   |
|                   | case 93 Q3                                  | 4           | 5 | 5 |   |
| INF-ANT           | Malaria                                     | case 94 Q1  | 6 | 6 | 6 |
|                   |                                             | case 94 Q2  | 6 | 6 | 6 |
|                   |                                             | case 94 Q3  | 5 | 6 | 6 |
|                   | Endolytic amoebiasis                        | case 95 Q1  | 6 | 4 | 4 |
|                   |                                             | case 95 Q2  | 5 | 5 | 5 |
|                   |                                             | case 95 Q3  | 4 | 4 | 4 |
|                   | Leishmaniasis                               | case 96 Q1  | 6 | 6 | 6 |
|                   |                                             | case 96 Q2  | 4 | 6 | 5 |
|                   |                                             | case 96 Q3  | 5 | 5 | 6 |
|                   | Clonorchiasis sinensis                      | case 97 Q1  | 6 | 6 | 6 |
|                   |                                             | case 97 Q2  | 6 | 6 | 6 |
|                   |                                             | case 97 Q3  | 5 | 5 | 5 |
| Hookworm disease  | case 98 Q1                                  | 6           | 6 | 6 |   |
|                   | case 98 Q2                                  | 5           | 6 | 6 |   |
|                   | case 98 Q3                                  | 5           | 6 | 6 |   |
| ORG               | Lung transplantation                        | case 99 Q1  | 6 | 6 | 6 |
|                   |                                             | case 99 Q2  | 6 | 4 | 5 |
|                   |                                             | case 99 Q3  | 4 | 4 | 4 |
|                   | Renal transplantation                       | case 100 Q1 | 6 | 6 | 6 |
|                   |                                             | case 100 Q2 | 6 | 6 | 5 |
|                   |                                             | case 100 Q3 | 6 | 5 | 6 |

HEM: Hematologic Evaluation & Management; ORG: Organ-specific Pathology & Diagnostics; MET: Metabolic & Endocrine Testing; IMM: Immune-mediated Disorders; INF-ANT: Infectious Diseases & Antimicrobial Testing; GEN-OB: Genetic & Obstetric Diagnostics; ONC: Oncology Laboratory Diagnostics.

**Supplement Table 1-2 The completeness scores for the 100 cases**

| Disease type                | Disease                                      | Case       | ouput1 | output2 | output3 |
|-----------------------------|----------------------------------------------|------------|--------|---------|---------|
| HEM                         | Iron deficiency anemia                       | case 1 Q1  | 3      | 2       | 2       |
|                             |                                              | case 1 Q2  | 3      | 2       | 2       |
|                             |                                              | case 1 Q3  | 3      | 2       | 2       |
|                             | Megaloblastic anemia                         | case 2 Q1  | 3      | 2       | 3       |
|                             |                                              | case 2 Q2  | 1      | 1       | 1       |
|                             |                                              | case 2 Q3  | 1      | 1       | 1       |
|                             | Aplastic anemia                              | case 3 Q1  | 3      | 2       | 2       |
|                             |                                              | case 3 Q2  | 2      | 1       | 1       |
|                             |                                              | case 3 Q3  | 2      | 2       | 2       |
|                             | Hereditary spherocytosis                     | case 4 Q1  | 3      | 2       | 2       |
|                             |                                              | case 4 Q2  | 1      | 1       | 1       |
|                             |                                              | case 4 Q3  | 3      | 2       | 2       |
|                             | Glucose-6-phosphatedehydrogenase deficiency  | case 5 Q1  | 3      | 2       | 2       |
|                             |                                              | case 5 Q2  | 2      | 2       | 2       |
|                             |                                              | case 5 Q3  | 2      | 2       | 2       |
|                             | Symptomatic anemia                           | case 6 Q1  | 1      | 1       | 1       |
|                             |                                              | case 6 Q2  | 2      | 2       | 2       |
|                             |                                              | case 6 Q3  | 3      | 1       | 1       |
|                             | Acute leukemia                               | case 7 Q1  | 2      | 2       | 2       |
|                             |                                              | case 7 Q2  | 2      | 2       | 2       |
|                             |                                              | case 7 Q3  | 1      | 1       | 2       |
|                             | Myelodysplastic syndromes                    | case 8 Q1  | 2      | 2       | 2       |
|                             |                                              | case 8 Q2  | 3      | 2       | 2       |
|                             |                                              | case 8 Q3  | 2      | 1       | 2       |
|                             | Chronic lymphocytic leukemia                 | case 9 Q1  | 1      | 3       | 2       |
|                             |                                              | case 9 Q2  | 1      | 3       | 1       |
|                             |                                              | case 9 Q3  | 3      | 2       | 1       |
|                             | Hairy cell leukemia                          | case 10 Q1 | 2      | 2       | 2       |
|                             |                                              | case 10 Q2 | 1      | 1       | 1       |
|                             |                                              | case 10 Q3 | 1      | 2       | 2       |
|                             | Multiple myeloma                             | case 11 Q1 | 3      | 2       | 2       |
|                             |                                              | case 11 Q2 | 1      | 1       | 1       |
|                             |                                              | case 11 Q3 | 1      | 2       | 2       |
|                             | Leukemoid reaction                           | case 12 Q1 | 3      | 2       | 1       |
|                             |                                              | case 12 Q2 | 1      | 1       | 1       |
|                             |                                              | case 12 Q3 | 1      | 1       | 1       |
|                             | Vascular von willebrand disease              | case 13 Q1 | 2      | 2       | 2       |
|                             |                                              | case 13 Q2 | 2      | 2       | 2       |
|                             |                                              | case 13 Q3 | 2      | 2       | 1       |
|                             | Primary immunologic thrombocytopenic purpura | case 14 Q1 | 2      | 3       | 3       |
|                             |                                              | case 14 Q2 | 1      | 1       | 1       |
|                             |                                              | case 14 Q3 | 2      | 2       | 2       |
|                             | Anaphylactoid purpura                        | case 15 Q1 | 2      | 2       | 1       |
|                             |                                              | case 15 Q2 | 1      | 1       | 1       |
|                             |                                              | case 15 Q3 | 1      | 1       | 1       |
|                             | Vitamin K deficiency                         | case 16 Q1 | 1      | 2       | 1       |
|                             |                                              | case 16 Q2 | 1      | 2       | 2       |
|                             |                                              | case 16 Q3 | 1      | 2       | 2       |
| Essential hypertension      | case 17 Q1                                   | 1          | 2      | 2       |         |
|                             | case 17 Q2                                   | 2          | 1      | 1       |         |
|                             | case 17 Q3                                   | 2          | 2      | 2       |         |
| Secondary hypertension      | case 18 Q1                                   | 3          | 2      | 2       |         |
|                             | case 18 Q2                                   | 2          | 3      | 3       |         |
|                             | case 18 Q3                                   | 2          | 3      | 3       |         |
| Acute myocardial infarction | case 19 Q1                                   | 3          | 3      | 2       |         |
|                             | case 19 Q2                                   | 1          | 1      | 3       |         |

|                       |                              |            |   |   |   |
|-----------------------|------------------------------|------------|---|---|---|
| ORG                   | Heart failure                | case 19 Q3 | 2 | 1 | 2 |
|                       |                              | case 20 Q1 | 3 | 2 | 2 |
|                       |                              | case 20 Q2 | 1 | 1 | 1 |
|                       |                              | case 20 Q3 | 2 | 2 | 2 |
|                       | Acute viral hepatitis type B | case 21 Q1 | 2 | 3 | 3 |
|                       |                              | case 21 Q2 | 2 | 3 | 3 |
|                       |                              | case 21 Q3 | 2 | 3 | 3 |
|                       | Chronic hepatitis B          | case 22 Q1 | 3 | 3 | 3 |
|                       |                              | case 22 Q2 | 2 | 3 | 3 |
|                       |                              | case 22 Q3 | 2 | 3 | 3 |
|                       | Acute hepatitis E            | case 23 Q1 | 1 | 3 | 3 |
|                       |                              | case 23 Q2 | 3 | 3 | 3 |
|                       |                              | case 23 Q3 | 2 | 3 | 3 |
|                       | Alcoholic liver disease      | case 24 Q1 | 3 | 2 | 2 |
|                       |                              | case 24 Q2 | 2 | 2 | 2 |
|                       |                              | case 24 Q3 | 3 | 2 | 2 |
|                       | Acute glomerulonephritis     | case 25 Q1 | 2 | 3 | 3 |
|                       |                              | case 25 Q2 | 3 | 3 | 3 |
|                       |                              | case 25 Q3 | 2 | 3 | 2 |
|                       | Nephrotic syndrome           | case 26 Q1 | 3 | 2 | 2 |
|                       |                              | case 26 Q2 | 1 | 2 | 1 |
|                       |                              | case 26 Q3 | 3 | 3 | 3 |
|                       | Chronic renal failure        | case 27 Q1 | 3 | 3 | 2 |
|                       |                              | case 27 Q2 | 3 | 3 | 3 |
|                       |                              | case 27 Q3 | 2 | 3 | 2 |
|                       | Diabetes complications       | case 28 Q1 | 2 | 3 | 2 |
|                       |                              | case 28 Q2 | 3 | 2 | 2 |
|                       |                              | case 28 Q3 | 2 | 3 | 2 |
|                       | Pepticulcer                  | case 29 Q1 | 3 | 3 | 3 |
|                       |                              | case 29 Q2 | 1 | 1 | 1 |
|                       |                              | case 29 Q3 | 2 | 1 | 2 |
|                       | Chronic gastritis            | case 30 Q1 | 3 | 2 | 2 |
|                       |                              | case 30 Q2 | 1 | 2 | 2 |
|                       |                              | case 30 Q3 | 1 | 1 | 1 |
|                       | Chronic diarrhea             | case 31 Q1 | 1 | 2 | 2 |
|                       |                              | case 31 Q2 | 2 | 3 | 3 |
|                       |                              | case 31 Q3 | 2 | 3 | 3 |
|                       | Intestinal tuberculosis      | case 32 Q1 | 1 | 1 | 1 |
|                       |                              | case 32 Q2 | 1 | 1 | 1 |
|                       |                              | case 32 Q3 | 1 | 2 | 2 |
|                       | Acute pancreatitis           | case 33 Q1 | 3 | 2 | 2 |
|                       |                              | case 33 Q2 | 2 | 3 | 2 |
| case 33 Q3            |                              | 3          | 3 | 3 |   |
| Cushing's syndrome    | case 34 Q1                   | 2          | 3 | 2 |   |
|                       | case 34 Q2                   | 1          | 1 | 1 |   |
|                       | case 34 Q3                   | 3          | 3 | 2 |   |
| Primary aldosteronism | case 35 Q1                   | 3          | 3 | 3 |   |
|                       | case 35 Q2                   | 1          | 1 | 2 |   |
|                       | case 35 Q3                   | 3          | 3 | 2 |   |
| Hyperthyroidism       | case 36 Q1                   | 2          | 2 | 2 |   |
|                       | case 36 Q2                   | 1          | 2 | 2 |   |
|                       | case 36 Q3                   | 1          | 2 | 2 |   |
| Hypothyroidism        | case 37 Q1                   | 3          | 3 | 3 |   |
|                       | case 37 Q2                   | 1          | 1 | 1 |   |
|                       | case 37 Q3                   | 2          | 2 | 2 |   |
| Hituitary dwarfism    | case 38 Q1                   | 1          | 1 | 2 |   |
|                       | case 38 Q2                   | 1          | 1 | 1 |   |
|                       | case 38 Q3                   | 2          | 3 | 2 |   |

|                                |                                 |            |   |   |   |
|--------------------------------|---------------------------------|------------|---|---|---|
| MET                            | Diabetes insipidus              | case 39 Q1 | 3 | 3 | 2 |
|                                |                                 | case 39 Q2 | 1 | 2 | 1 |
|                                |                                 | case 39 Q3 | 1 | 2 | 2 |
|                                | Precocious puberty              | case 40 Q1 | 3 | 2 | 2 |
|                                |                                 | case 40 Q2 | 3 | 3 | 1 |
|                                |                                 | case 40 Q3 | 2 | 2 | 2 |
|                                | Polycystic ovary syndrome       | case 41 Q1 | 3 | 3 | 3 |
|                                |                                 | case 41 Q2 | 1 | 1 | 1 |
|                                |                                 | case 41 Q3 | 2 | 1 | 1 |
|                                | Vitamin D deficiency rickets    | case 42 Q1 | 3 | 3 | 2 |
|                                |                                 | case 42 Q2 | 2 | 3 | 2 |
|                                |                                 | case 42 Q3 | 1 | 2 | 2 |
|                                | Senile osteoporosis             | case 43 Q1 | 3 | 3 | 3 |
|                                |                                 | case 43 Q2 | 2 | 2 | 2 |
|                                |                                 | case 43 Q3 | 3 | 3 | 3 |
|                                | Ricketsandosteomalacia          | case 44 Q1 | 1 | 1 | 1 |
|                                |                                 | case 44 Q2 | 1 | 1 | 1 |
|                                |                                 | case 44 Q3 | 2 | 1 | 1 |
| Acute suppurative arthritis    | case 45 Q1                      | 3          | 3 | 3 |   |
|                                | case 45 Q2                      | 1          | 1 | 1 |   |
|                                | case 45 Q3                      | 2          | 3 | 1 |   |
| Coxotuberculosis               | case 46 Q1                      | 1          | 1 | 1 |   |
|                                | case 46 Q2                      | 1          | 1 | 1 |   |
|                                | case 46 Q3                      | 1          | 2 | 2 |   |
| Bronchial asthma               | case 47 Q1                      | 3          | 3 | 3 |   |
|                                | case 47 Q2                      | 1          | 1 | 1 |   |
|                                | case 47 Q3                      | 2          | 2 | 2 |   |
| Hemolytic disease of newborn   | case 48 Q1                      | 3          | 3 | 2 |   |
|                                | case 48 Q2                      | 3          | 3 | 2 |   |
|                                | case 48 Q3                      | 2          | 3 | 3 |   |
| Systemic lupus erythematosus   | case 49 Q1                      | 2          | 3 | 3 |   |
|                                | case 49 Q2                      | 3          | 2 | 2 |   |
|                                | case 49 Q3                      | 2          | 2 | 2 |   |
| Rheumatoid arthritis           | case 50 Q1                      | 2          | 3 | 3 |   |
|                                | case 50 Q2                      | 1          | 1 | 1 |   |
|                                | case 50 Q3                      | 1          | 2 | 2 |   |
| Systemic lupus erythematosus   | case 51 Q1                      | 2          | 3 | 3 |   |
|                                | case 51 Q2                      | 2          | 1 | 1 |   |
|                                | case 51 Q3                      | 2          | 2 | 2 |   |
| Ankylosing spondylitis         | case 52 Q1                      | 2          | 3 | 3 |   |
|                                | case 52 Q2                      | 1          | 1 | 1 |   |
|                                | case 52 Q3                      | 2          | 2 | 2 |   |
| Sjogren's syndrome             | case 53 Q1                      | 2          | 3 | 3 |   |
|                                | case 53 Q2                      | 1          | 1 | 1 |   |
|                                | case 53 Q3                      | 2          | 3 | 3 |   |
| Febrile response               | case 54 Q1                      | 2          | 2 | 2 |   |
|                                | case 54 Q2                      | 1          | 2 | 2 |   |
|                                | case 54 Q3                      | 2          | 3 | 2 |   |
| Infectious diarrhea            | case 55 Q1                      | 2          | 3 | 2 |   |
|                                | case 55 Q2                      | 1          | 1 | 1 |   |
|                                | case 55 Q3                      | 2          | 3 | 2 |   |
| Genitourinary system infection | case 56 Q1                      | 2          | 3 | 3 |   |
|                                | case 56 Q2                      | 2          | 3 | 3 |   |
|                                | case 56 Q3                      | 2          | 2 | 2 |   |
| INF-ANT                        | Skin and soft tissue infections | case 57 Q1 | 3 | 3 | 3 |
|                                |                                 | case 57 Q2 | 1 | 1 | 1 |
|                                |                                 | case 57 Q3 | 1 | 2 | 2 |
|                                |                                 | case 58 Q1 | 2 | 2 | 2 |

|                          |                               |                                  |            |   |   |   |
|--------------------------|-------------------------------|----------------------------------|------------|---|---|---|
|                          | Community acquired pneumonia  | case 58 Q2                       | 1          | 1 | 1 |   |
|                          |                               | case 58 Q3                       | 2          | 2 | 2 |   |
|                          | Hospital acquired pneumonia   | case 59 Q1                       | 3          | 3 | 3 |   |
|                          |                               | case 59 Q2                       | 2          | 2 | 2 |   |
|                          | Zoonosis                      | case 59 Q3                       | 2          | 2 | 2 |   |
|                          |                               | case 60 Q1                       | 3          | 2 | 3 |   |
| case 60 Q2               |                               | 1                                | 2          | 2 |   |   |
| GEN-OB                   | Ectopic pregnancy             | case 60 Q3                       | 2          | 2 | 2 |   |
|                          |                               | case 61 Q1                       | 2          | 3 | 3 |   |
|                          |                               | case 61 Q2                       | 1          | 1 | 2 |   |
|                          | Gestational diabetes mellitus | case 61 Q3                       | 2          | 2 | 2 |   |
|                          |                               | case 62 Q1                       | 3          | 3 | 3 |   |
|                          |                               | case 62 Q2                       | 2          | 1 | 1 |   |
|                          | Infertility                   | case 62 Q3                       | 2          | 2 | 2 |   |
|                          |                               | case 63 Q1                       | 3          | 3 | 2 |   |
|                          |                               | case 63 Q2                       | 2          | 2 | 2 |   |
|                          | Antenatal examination         | case 63 Q3                       | 2          | 3 | 3 |   |
|                          |                               | case 64 Q1                       | 2          | 2 | 2 |   |
|                          |                               | case 64 Q2                       | 2          | 3 | 3 |   |
|                          | Down syndrome                 | case 64 Q3                       | 3          | 3 | 3 |   |
|                          |                               | case 65 Q1                       | 3          | 3 | 2 |   |
|                          |                               | case 65 Q2                       | 1          | 2 | 2 |   |
|                          | Phenylketonuria               | case 65 Q3                       | 2          | 2 | 2 |   |
|                          |                               | case 66 Q1                       | 3          | 3 | 2 |   |
|                          |                               | case 66 Q2                       | 1          | 1 | 1 |   |
|                          | Thalassemia                   | case 66 Q3                       | 3          | 3 | 2 |   |
|                          |                               | case 67 Q1                       | 3          | 3 | 2 |   |
|                          |                               | case 67 Q2                       | 2          | 2 | 2 |   |
|                          | Hemophilia                    | case 67 Q3                       | 2          | 3 | 3 |   |
|                          |                               | case 68 Q1                       | 2          | 3 | 3 |   |
|                          |                               | case 68 Q2                       | 2          | 1 | 1 |   |
| ONC                      | Lung cancer                   | case 68 Q3                       | 2          | 2 | 2 |   |
|                          |                               | case 69 Q1                       | 2          | 3 | 3 |   |
|                          |                               | case 69 Q2                       | 1          | 2 | 2 |   |
|                          | Gastric cancer                | case 69 Q3                       | 3          | 2 | 2 |   |
|                          |                               | case 70 Q1                       | 2          | 3 | 2 |   |
|                          |                               | case 70 Q2                       | 1          | 1 | 1 |   |
|                          | Liver cancer                  | case 70 Q3                       | 2          | 2 | 2 |   |
|                          |                               | case 71 Q1                       | 2          | 2 | 2 |   |
|                          |                               | case 71 Q2                       | 1          | 2 | 2 |   |
|                          | Colorectal cancer             | case 71 Q3                       | 2          | 2 | 2 |   |
|                          |                               | case 72 Q1                       | 2          | 2 | 2 |   |
|                          |                               | case 72 Q2                       | 1          | 1 | 1 |   |
|                          | Breast cancer                 | case 72 Q3                       | 2          | 2 | 2 |   |
|                          |                               | case 73 Q1                       | 2          | 3 | 2 |   |
|                          |                               | case 73 Q2                       | 1          | 1 | 1 |   |
|                          | Prostate cancer               | case 73 Q3                       | 2          | 2 | 2 |   |
|                          |                               | case 74 Q1                       | 3          | 2 | 2 |   |
|                          |                               | case 74 Q2                       | 2          | 2 | 2 |   |
|                          | Ovarian cancer                | case 74 Q3                       | 1          | 1 | 1 |   |
|                          |                               | case 75 Q1                       | 2          | 2 | 2 |   |
|                          |                               | case 75 Q2                       | 1          | 2 | 1 |   |
|                          |                               | Pseudomonas aeruginosa pneumonia | case 75 Q3 | 2 | 2 | 2 |
|                          |                               |                                  | case 76 Q1 | 1 | 3 | 2 |
|                          |                               |                                  | case 76 Q2 | 3 | 3 | 3 |
| Late pregnancy phlogosis |                               | case 76 Q3                       | 2          | 2 | 2 |   |
|                          |                               | case 77 Q1                       | 1          | 1 | 1 |   |
|                          |                               | case 77 Q2                       | 2          | 1 | 1 |   |

|                    |                                             |            |   |   |   |
|--------------------|---------------------------------------------|------------|---|---|---|
| INF-ANT            | Pulmonary tuberculosis                      | case 77 Q3 | 1 | 1 | 1 |
|                    |                                             | case 78 Q1 | 1 | 1 | 1 |
|                    |                                             | case 78 Q2 | 1 | 1 | 1 |
|                    |                                             | case 78 Q3 | 1 | 1 | 2 |
|                    | Fungal cholecystitis                        | case 79 Q1 | 3 | 2 | 2 |
|                    |                                             | case 79 Q2 | 2 | 2 | 2 |
| case 79 Q3         |                                             | 1          | 2 | 2 |   |
| MET                | Type 1 diabetes mellitus                    | case 80 Q1 | 2 | 3 | 2 |
|                    |                                             | case 80 Q2 | 3 | 3 | 2 |
|                    |                                             | case 80 Q3 | 3 | 3 | 2 |
|                    | Type 2 diabetes mellitus                    | case 81 Q1 | 3 | 1 | 2 |
|                    |                                             | case 81 Q2 | 3 | 3 | 3 |
|                    |                                             | case 81 Q3 | 3 | 2 | 3 |
|                    | Hypoglycemia                                | case 82 Q1 | 3 | 3 | 3 |
|                    |                                             | case 82 Q2 | 3 | 2 | 3 |
|                    |                                             | case 82 Q3 | 1 | 1 | 1 |
|                    | Diabetic ketoacidosis                       | case 83 Q1 | 3 | 3 | 3 |
|                    |                                             | case 83 Q2 | 2 | 2 | 3 |
|                    |                                             | case 83 Q3 | 2 | 2 | 2 |
|                    | Hyperosmotic nonketotic diabetic coma       | case 84 Q1 | 3 | 3 | 3 |
|                    |                                             | case 84 Q2 | 1 | 3 | 2 |
|                    |                                             | case 84 Q3 | 1 | 2 | 1 |
|                    | Hyperlipidemia                              | case 85 Q1 | 1 | 1 | 1 |
|                    |                                             | case 85 Q2 | 1 | 1 | 2 |
|                    |                                             | case 85 Q3 | 1 | 2 | 2 |
| Hypolipidemia      | case 86 Q1                                  | 3          | 3 | 3 |   |
|                    | case 86 Q2                                  | 1          | 2 | 2 |   |
|                    | case 86 Q3                                  | 1          | 1 | 1 |   |
| ORG                | Chronic obstructive pulmonary diseases      | case 87 Q1 | 3 | 3 | 3 |
|                    |                                             | case 87 Q2 | 2 | 2 | 2 |
|                    |                                             | case 87 Q3 | 1 | 2 | 2 |
|                    | Bronchial asthma                            | case 88 Q1 | 3 | 3 | 3 |
|                    |                                             | case 88 Q2 | 1 | 1 | 1 |
|                    |                                             | case 88 Q3 | 2 | 2 | 2 |
|                    | Pleural effusion                            | case 89 Q1 | 2 | 2 | 2 |
|                    |                                             | case 89 Q2 | 3 | 3 | 2 |
|                    |                                             | case 89 Q3 | 2 | 2 | 1 |
|                    | Respiratory failure                         | case 90 Q1 | 3 | 3 | 1 |
|                    |                                             | case 90 Q2 | 2 | 2 | 1 |
|                    |                                             | case 90 Q3 | 2 | 2 | 2 |
| Pulmonary embolism | case 91 Q1                                  | 1          | 1 | 1 |   |
|                    | case 91 Q2                                  | 2          | 2 | 2 |   |
|                    | case 91 Q3                                  | 1          | 1 | 1 |   |
| HEM                | Febrile non-haemolytic transfusion reaction | case 92 Q1 | 3 | 3 | 3 |
|                    |                                             | case 92 Q2 | 1 | 1 | 3 |
|                    |                                             | case 92 Q3 | 1 | 2 | 2 |
|                    | Acute hepatitis C                           | case 93 Q1 | 2 | 3 | 3 |
|                    |                                             | case 93 Q2 | 3 | 3 | 2 |
|                    |                                             | case 93 Q3 | 2 | 2 | 2 |
| INF-ANT            | Malaria                                     | case 94 Q1 | 3 | 3 | 3 |
|                    |                                             | case 94 Q2 | 3 | 3 | 3 |
|                    |                                             | case 94 Q3 | 2 | 3 | 3 |
|                    | Endolytic amoebiasis                        | case 95 Q1 | 3 | 2 | 2 |
|                    |                                             | case 95 Q2 | 3 | 2 | 3 |
|                    |                                             | case 95 Q3 | 1 | 1 | 1 |
|                    | Leishmaniasis                               | case 96 Q1 | 3 | 3 | 3 |
|                    |                                             | case 96 Q2 | 1 | 2 | 2 |
|                    |                                             | case 96 Q3 | 2 | 3 | 3 |

|                                                                                                                                                                                                                                                                                                                            |                        |             |   |   |   |
|----------------------------------------------------------------------------------------------------------------------------------------------------------------------------------------------------------------------------------------------------------------------------------------------------------------------------|------------------------|-------------|---|---|---|
|                                                                                                                                                                                                                                                                                                                            | Clonorchiasis sinensis | case 97 Q1  | 3 | 3 | 3 |
|                                                                                                                                                                                                                                                                                                                            |                        | case 97 Q2  | 3 | 3 | 3 |
|                                                                                                                                                                                                                                                                                                                            |                        | case 97 Q3  | 2 | 2 | 2 |
|                                                                                                                                                                                                                                                                                                                            | Hookworm disease       | case 98 Q1  | 3 | 3 | 3 |
|                                                                                                                                                                                                                                                                                                                            |                        | case 98 Q2  | 2 | 3 | 3 |
|                                                                                                                                                                                                                                                                                                                            |                        | case 98 Q3  | 2 | 3 | 3 |
| ORG                                                                                                                                                                                                                                                                                                                        | Lung transplantation   | case 99 Q1  | 3 | 3 | 3 |
|                                                                                                                                                                                                                                                                                                                            |                        | case 99 Q2  | 3 | 1 | 3 |
|                                                                                                                                                                                                                                                                                                                            |                        | case 99 Q3  | 1 | 1 | 1 |
|                                                                                                                                                                                                                                                                                                                            | Renal transplantation  | case 100 Q1 | 3 | 3 | 3 |
|                                                                                                                                                                                                                                                                                                                            |                        | case 100 Q2 | 3 | 2 | 2 |
|                                                                                                                                                                                                                                                                                                                            |                        | case 100 Q3 | 3 | 1 | 3 |
| <p>HEM: Hematologic Evaluation &amp; Management; ORG: Organ-specific Pathology &amp; Diagnostics; MET: Metabolic &amp; Endocrine Testing; IMM: Immune-mediated Disorders; INF-ANT: Infectious Diseases &amp; Antimicrobial Testing; GEN-OB: Genetic &amp; Obstetric Diagnostics; ONC: Oncology Laboratory Diagnostics.</p> |                        |             |   |   |   |
